# Supplementary material
Source: PubMed Central journal article supplement (PMC8279090)
Supplement: NEJMc2107799_disclosures.pdf [file NEJMc2107799_disclosures.pdf]

**Disclosure Purpose:** 21-07799

### Summary of Interests

I do not have any interests to disclose at this time.

### Additional Questions:

- Are there other relationships or activities that readers could perceive to have influenced, or that give the appearance of potentially influencing, what you wrote in the submitted work?**  
No.
- What is the manuscript title?**  
Infection and Vaccine-Induced Neutralizing Antibody Responses to the SARS-CoV-2 B.1.617 Variants
- Are you the corresponding author?**  
No.

### Certification

I certify that the information provided in this disclosure is complete and accurate.

**Disclosure Purpose:** 21-07799

**Summary of Interests**

I do not have any interests to disclose at this time.

**Additional Questions:**

- 1. **Are there other relationships or activities that readers could perceive to have influenced, or that give the appearance of potentially influencing, what you wrote in the submitted work?**  
No.
- 2. **What is the manuscript title?**  
Infection and Vaccine-Induced Neutralizing Antibody Responses to the SARS-CoV-2 B.1.617 Variants
- 3. **Are you the corresponding author?**  
No.

**Certification**

I certify that the information provided in this disclosure is complete and accurate.

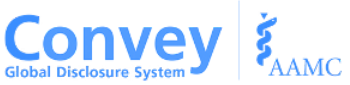

**Disclosure Purpose:** 21-07799

**Summary of Interests**

I do not have any interests to disclose at this time.

**Additional Questions:**

- 1. **Are there other relationships or activities that readers could perceive to have influenced, or that give the appearance of potentially influencing, what you wrote in the submitted work?**  
No.
- 2. **What is the manuscript title?**  
Infection and Vaccine-Induced Neutralizing Antibody Responses to the SARS-CoV-2 B.1.617 Variants
- 3. **Are you the corresponding author?**  
No.

**Certification**

I certify that the information provided in this disclosure is complete and accurate.



**Disclosure Purpose:** 21-07799

**Summary of Interests**

I do not have any interests to disclose at this time.

**Additional Questions:**

- 1. **Are there other relationships or activities that readers could perceive to have influenced, or that give the appearance of potentially influencing, what you wrote in the submitted work?**  
No.
- 2. **What is the manuscript title?**  
Infection and Vaccine-Induced Neutralizing Antibody Responses to the SARS-CoV-2 B.1.617 Variants
- 3. **Are you the corresponding author?**  
No.

**Certification**

I certify that the information provided in this disclosure is complete and accurate.



**Disclosure Purpose:** 21-07799

### Summary of Interests

I do not have any interests to disclose at this time.

### Additional Questions:

- Are there other relationships or activities that readers could perceive to have influenced, or that give the appearance of potentially influencing, what you wrote in the submitted work?**  
No.
- What is the manuscript title?**  
Infection and Vaccine-Induced Neutralizing Antibody Responses to the SARS-CoV-2 B.1.617 Variants
- Are you the corresponding author?**  
No.

### Certification

I certify that the information provided in this disclosure is complete and accurate.

**Disclosure Purpose:** 21-07799

**Summary of Interests**

I do not have any interests to disclose at this time.

**Additional Questions:**

- 1. **Are there other relationships or activities that readers could perceive to have influenced, or that give the appearance of potentially influencing, what you wrote in the submitted work?**  
No.
- 2. **What is the manuscript title?**  
Infection and Vaccine-Induced Neutralizing Antibody Responses to the SARS-CoV-2 B.1.617 Variants
- 3. **Are you the corresponding author?**  
No.

**Certification**

I certify that the information provided in this disclosure is complete and accurate.



**Disclosure Purpose:** 21-07799

**Summary of Interests**

I do not have any interests to disclose at this time.

**Additional Questions:**

- Are there other relationships or activities that readers could perceive to have influenced, or that give the appearance of potentially influencing, what you wrote in the submitted work?**  
No.
- What is the manuscript title?**  
Infection and Vaccine-Induced Neutralizing Antibody Responses to the SARS-CoV-2 B.1.617 Variants
- Are you the corresponding author?**  
No.

**Certification**

I certify that the information provided in this disclosure is complete and accurate.



**Disclosure Purpose:** 21-07799

### Summary of Interests

I do not have any interests to disclose at this time.

### Additional Questions:

- Are there other relationships or activities that readers could perceive to have influenced, or that give the appearance of potentially influencing, what you wrote in the submitted work?**  
No.
- What is the manuscript title?**  
Infection and Vaccine-Induced Neutralizing Antibody Responses to the SARS-CoV-2 B.1.617 Variants
- Are you the corresponding author?**  
No.

### Certification

I certify that the information provided in this disclosure is complete and accurate.



**Disclosure Purpose:** 21-07799

### Summary of Interests

I do not have any interests to disclose at this time.

### Additional Questions:

- Are there other relationships or activities that readers could perceive to have influenced, or that give the appearance of potentially influencing, what you wrote in the submitted work?**  
No.
- What is the manuscript title?**  
Infection and vaccine-induced neutralizing antibody responses to the SARS-CoV-2 B.1.617 variants
- Are you the corresponding author?**  
No.

### Certification

I certify that the information provided in this disclosure is complete and accurate.

**Disclosure Purpose:** 21-07799

### Summary of Interests

I do not have any interests to disclose at this time.

### Additional Questions:

- Are there other relationships or activities that readers could perceive to have influenced, or that give the appearance of potentially influencing, what you wrote in the submitted work?**  
No.
- What is the manuscript title?**  
Infection and Vaccine-Induced Neutralizing Antibody Responses to the SARS-CoV-2 B.1.617 Variants
- Are you the corresponding author?**  
No.

### Certification

I certify that the information provided in this disclosure is complete and accurate.

**Disclosure Purpose:** 21-07799

### Summary of Interests

I do not have any interests to disclose at this time.

### Additional Questions:

- Are there other relationships or activities that readers could perceive to have influenced, or that give the appearance of potentially influencing, what you wrote in the submitted work?**  
No.
- What is the manuscript title?**  
Infection and Vaccine-Induced Neutralizing Antibody Responses to the SARS-CoV-2 B.1.617 Variants
- Are you the corresponding author?**  
No.

### Certification

I certify that the information provided in this disclosure is complete and accurate.

**Disclosure Purpose:** 21-07799

**Summary of Interests**

I do not have any interests to disclose at this time.

**Additional Questions:**

- 1. **Are there other relationships or activities that readers could perceive to have influenced, or that give the appearance of potentially influencing, what you wrote in the submitted work?**  
No.
- 2. **What is the manuscript title?**  
Infection and Vaccine-Induced Neutralizing Antibody Responses to the SARS-CoV-2 B.1.617 Variants
- 3. **Are you the corresponding author?**  
No.

**Certification**

I certify that the information provided in this disclosure is complete and accurate.

**Disclosure Purpose:** 21-07799

### Summary of Interests

I do not have any interests to disclose at this time.

### Additional Questions:

- Are there other relationships or activities that readers could perceive to have influenced, or that give the appearance of potentially influencing, what you wrote in the submitted work?**  
No.
- What is the manuscript title?**  
Infection and Vaccine-Induced Neutralizing Antibody Responses to the SARS-CoV-2 B.1.617 Variants
- Are you the corresponding author?**  
No.

### Certification

I certify that the information provided in this disclosure is complete and accurate.

Disclosure Purpose: 21-07799

## Summary of Interests

### Intellectual Property

| Type                                                                                                                                                                                                                                                                                                                                                                                                                                                                                    | Is Licensed                                        | Interest Held By                                                                                                                                                                                                                                                                                                                                                             |      |                                 |                                                    |        |                     |                                                    |        |             |                                                    |        |  |  |
|-----------------------------------------------------------------------------------------------------------------------------------------------------------------------------------------------------------------------------------------------------------------------------------------------------------------------------------------------------------------------------------------------------------------------------------------------------------------------------------------|----------------------------------------------------|------------------------------------------------------------------------------------------------------------------------------------------------------------------------------------------------------------------------------------------------------------------------------------------------------------------------------------------------------------------------------|------|---------------------------------|----------------------------------------------------|--------|---------------------|----------------------------------------------------|--------|-------------|----------------------------------------------------|--------|--|--|
| <b>Patent - Prefusion coronavirus spike proteins and their u</b>                                                                                                                                                                                                                                                                                                                                                                                                                        | No                                                 | Self                                                                                                                                                                                                                                                                                                                                                                         |      |                                 |                                                    |        |                     |                                                    |        |             |                                                    |        |  |  |
| <i>Description:</i> Prefusion coronavirus spike proteins and their use<br><i>Patent Status:</i> Pending<br><i>Filing Jurisdiction:</i> EU<br><i>Licensees:</i>                                                                                                                                                                                                                                                                                                                          |                                                    | <i>Patent Number:</i> Europe Patent Application No. 17800655.7<br><i>Patent Holder:</i> Current Institution<br><br><i>Additional Information:</i>                                                                                                                                                                                                                            |      |                                 |                                                    |        |                     |                                                    |        |             |                                                    |        |  |  |
| <b>Patent - SARS-CoV-2 Vaccine</b>                                                                                                                                                                                                                                                                                                                                                                                                                                                      | No                                                 | Self                                                                                                                                                                                                                                                                                                                                                                         |      |                                 |                                                    |        |                     |                                                    |        |             |                                                    |        |  |  |
| <i>Description:</i> SARS-CoV-2 Vaccine<br><i>Patent Status:</i> Provisional<br><i>Filing Jurisdiction:</i> USA<br><i>Licensees:</i>                                                                                                                                                                                                                                                                                                                                                     |                                                    | <i>Patent Number:</i> PCT Patent Application No. PCT/US2021/017709<br><i>Patent Holder:</i> Current Institution<br><br><i>Additional Information:</i>                                                                                                                                                                                                                        |      |                                 |                                                    |        |                     |                                                    |        |             |                                                    |        |  |  |
| <b>Patent - Prefusion coronavirus spike proteins and their u</b>                                                                                                                                                                                                                                                                                                                                                                                                                        | Yes                                                | Self                                                                                                                                                                                                                                                                                                                                                                         |      |                                 |                                                    |        |                     |                                                    |        |             |                                                    |        |  |  |
| <i>Description:</i> Prefusion coronavirus spike proteins and their use<br><i>Patent Status:</i> Issued<br><i>Filing Jurisdiction:</i> USA<br><i>Licensees:</i>                                                                                                                                                                                                                                                                                                                          |                                                    | <i>Patent Number:</i> US Patent No. 10,960,070<br><i>Patent Holder:</i> Current Institution<br><br><i>Additional Information:</i> This is a U.S. government patent on which I am the first named inventor. I will receive capped royalties according to NIH policy. All licenses are non-exclusive, and I have listed 3 licensees but there are others under confidentiality |      |                                 |                                                    |        |                     |                                                    |        |             |                                                    |        |  |  |
| <table border="1"> <thead> <tr> <th>Licensee</th> <th>Title</th> <th>Date</th> </tr> </thead> <tbody> <tr> <td>Medigen Vaccine Biologics Corp.</td> <td>Prefusion coronavirus spike proteins and their use</td> <td>9/1/20</td> </tr> <tr> <td>SANOFI PASTEUR INC.</td> <td>Prefusion coronavirus spike proteins and their use</td> <td>9/1/20</td> </tr> <tr> <td>BioNTech AG</td> <td>Prefusion coronavirus spike proteins and their use</td> <td>9/1/20</td> </tr> </tbody> </table> | Licensee                                           | Title                                                                                                                                                                                                                                                                                                                                                                        | Date | Medigen Vaccine Biologics Corp. | Prefusion coronavirus spike proteins and their use | 9/1/20 | SANOFI PASTEUR INC. | Prefusion coronavirus spike proteins and their use | 9/1/20 | BioNTech AG | Prefusion coronavirus spike proteins and their use | 9/1/20 |  |  |
| Licensee                                                                                                                                                                                                                                                                                                                                                                                                                                                                                | Title                                              | Date                                                                                                                                                                                                                                                                                                                                                                         |      |                                 |                                                    |        |                     |                                                    |        |             |                                                    |        |  |  |
| Medigen Vaccine Biologics Corp.                                                                                                                                                                                                                                                                                                                                                                                                                                                         | Prefusion coronavirus spike proteins and their use | 9/1/20                                                                                                                                                                                                                                                                                                                                                                       |      |                                 |                                                    |        |                     |                                                    |        |             |                                                    |        |  |  |
| SANOFI PASTEUR INC.                                                                                                                                                                                                                                                                                                                                                                                                                                                                     | Prefusion coronavirus spike proteins and their use | 9/1/20                                                                                                                                                                                                                                                                                                                                                                       |      |                                 |                                                    |        |                     |                                                    |        |             |                                                    |        |  |  |
| BioNTech AG                                                                                                                                                                                                                                                                                                                                                                                                                                                                             | Prefusion coronavirus spike proteins and their use | 9/1/20                                                                                                                                                                                                                                                                                                                                                                       |      |                                 |                                                    |        |                     |                                                    |        |             |                                                    |        |  |  |

### Additional Questions:

- Are there other relationships or activities that readers could perceive to have influenced, or that give the appearance of potentially influencing, what you wrote in the submitted work?**  
No.
- What is the manuscript title?**  
Infection and vaccine-induced neutralizing antibody responses to the SARS-CoV-2 B.1.617 variants
- Are you the corresponding author?**  
No.

### Certification

I certify that the information provided in this disclosure is complete and accurate.

**Disclosure Purpose:** 21-07799

Summary of Interests

I do not have any interests to disclose at this time.

Additional Questions:

- 1. **Are there other relationships or activities that readers could perceive to have influenced, or that give the appearance of potentially influencing, what you wrote in the submitted work?**  
No.
- 2. **What is the manuscript title?**  
Infection and Vaccine-Induced Neutralizing Antibody Responses to the SARS-CoV-2 B.1.617 Variants
- 3. **Are you the corresponding author?**  
No.

Certification

I certify that the information provided in this disclosure is complete and accurate.

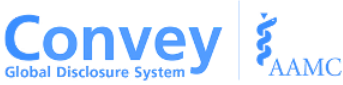

**Disclosure Purpose:** 21-07799

**Summary of Interests**

I do not have any interests to disclose at this time.

**Additional Questions:**

- Are there other relationships or activities that readers could perceive to have influenced, or that give the appearance of potentially influencing, what you wrote in the submitted work?**  
No.
- What is the manuscript title?**  
Infection and Vaccine-Induced Neutralizing Antibody Responses to the SARS-CoV-2 B.1.617 Variants
- Are you the corresponding author?**  
No.

**Certification**

I certify that the information provided in this disclosure is complete and accurate.



**Disclosure Purpose:** 21-07799

Summary of Interests

I do not have any interests to disclose at this time.

Additional Questions:

- 1. **Are there other relationships or activities that readers could perceive to have influenced, or that give the appearance of potentially influencing, what you wrote in the submitted work?**  
No.
- 2. **What is the manuscript title?**  
Infection and Vaccine-Induced Neutralizing Antibody Responses to the SARS-CoV-2 B.1.617 Variants
- 3. **Are you the corresponding author?**  
No.

Certification

I certify that the information provided in this disclosure is complete and accurate.



**Disclosure Purpose:** 21-07799

**Summary of Interests**

I do not have any interests to disclose at this time.

**Additional Questions:**

- Are there other relationships or activities that readers could perceive to have influenced, or that give the appearance of potentially influencing, what you wrote in the submitted work?**  
No.
- What is the manuscript title?**  
Infection and Vaccine-Induced Neutralizing Antibody Responses to the SARS-CoV-2 B.1.617 Variants
- Are you the corresponding author?**  
No.

**Certification**

I certify that the information provided in this disclosure is complete and accurate.



**Disclosure Purpose:** 21-07799

## Summary of Interests

I do not have any interests to disclose at this time.

## Additional Questions:

- Are there other relationships or activities that readers could perceive to have influenced, or that give the appearance of potentially influencing, what you wrote in the submitted work?**  
No.
- What is the manuscript title?**  
Infection and Vaccine-Induced Neutralizing Antibody Responses to the SARS-CoV2 B.1.617 Variants
- Are you the corresponding author?**  
No.

## Certification

I certify that the information provided in this disclosure is complete and accurate.

**Disclosure Purpose:** 21-07799

### Summary of Interests

I do not have any interests to disclose at this time.

### Additional Questions:

- Are there other relationships or activities that readers could perceive to have influenced, or that give the appearance of potentially influencing, what you wrote in the submitted work?**  
No.
- What is the manuscript title?**  
Infection and Vaccine-Induced Neutralizing Antibody Responses to the SARS-CoV-2 B.1.617 Variants
- Are you the corresponding author?**  
No.

### Certification

I certify that the information provided in this disclosure is complete and accurate.

**Disclosure Purpose:** 21-07799

### Summary of Interests

I do not have any interests to disclose at this time.

### Additional Questions:

- Are there other relationships or activities that readers could perceive to have influenced, or that give the appearance of potentially influencing, what you wrote in the submitted work?**  
No.
- What is the manuscript title?**  
Infection and Vaccine-Induced Neutralizing Antibody Responses to the SARS-CoV-2 B.1.617 Variants
- Are you the corresponding author?**  
No.

### Certification

I certify that the information provided in this disclosure is complete and accurate.

**Disclosure Purpose:** 21-07799

### Summary of Interests

I do not have any interests to disclose at this time.

### Additional Questions:

- Are there other relationships or activities that readers could perceive to have influenced, or that give the appearance of potentially influencing, what you wrote in the submitted work?**  
No.
- What is the manuscript title?**  
Infection and Vaccine-Induced Neutralizing Antibody Responses to the SARS-CoV-2 B.1.617 Variants
- Are you the corresponding author?**  
No.

### Certification

I certify that the information provided in this disclosure is complete and accurate.

**Disclosure Purpose:** 21-07799

### Summary of Interests

I do not have any interests to disclose at this time.

### Additional Questions:

- Are there other relationships or activities that readers could perceive to have influenced, or that give the appearance of potentially influencing, what you wrote in the submitted work?**  
No.
- What is the manuscript title?**  
Infection and Vaccine-Induced Neutralizing Antibody Responses to the SARS-CoV-2 B.1.617 Variants
- Are you the corresponding author?**  
No.

### Certification

I certify that the information provided in this disclosure is complete and accurate.

**Disclosure Purpose:** 21-07799

**Summary of Interests**

I do not have any interests to disclose at this time.

**Additional Questions:**

- 1. **Are there other relationships or activities that readers could perceive to have influenced, or that give the appearance of potentially influencing, what you wrote in the submitted work?**  
No.
- 2. **What is the manuscript title?**  
Infection and Vaccine-Induced Neutralizing Antibody Responses to the SARS-CoV-2 B.1.617 Variants
- 3. **Are you the corresponding author?**  
No.

**Certification**

I certify that the information provided in this disclosure is complete and accurate.





**Disclosure Purpose:** 21-07799

### Summary of Interests

I do not have any interests to disclose at this time.

### Additional Questions:

- Are there other relationships or activities that readers could perceive to have influenced, or that give the appearance of potentially influencing, what you wrote in the submitted work?**  
No.
- What is the manuscript title?**  
Infection and Vaccine-Induced Neutralizing Antibody Responses to the SARS-CoV-2 B.1.617 Variants
- Are you the corresponding author?**  
No.

### Certification

I certify that the information provided in this disclosure is complete and accurate.

Disclosure Purpose: 21-07799

## Summary of Interests

### Company or Organization

| Entity                         | Type       | Interest Held By                                                                                          |
|--------------------------------|------------|-----------------------------------------------------------------------------------------------------------|
| ModernaTX                      | Consultant | Self                                                                                                      |
| <i>Category:</i> Consultant    |            | <i>Description:</i> Consultation service to ModernaTX on the Epidemiology COVID-19 Variant Advisory Board |
| <i>Additional Information:</i> |            |                                                                                                           |

## Additional Questions:

- Are there other relationships or activities that readers could perceive to have influenced, or that give the appearance of potentially influencing, what you wrote in the submitted work?**  
No.
- What is the manuscript title?**  
Infection and vaccine-induced neutralizing antibody responses to the SARS-CoV-2 B.1.617 variants
- Are you the corresponding author?**  
Yes.
  - Please list the other authors' names here.**  
Venkata-Viswanadh Edara, Ph.D. Benjamin A. Pinsky MD, Ph.D. Lilin Lai, M.D. Meredith E. Davis-Gardner, Ph.D. Katharine Floyd, B.S. Maria W. Flowers, B.S. Jens Wrammert, Ph.D. Laila Hussaini, M.PH. Caroline Rose Ciric, B.S. Sarah Bechnak, B.S.N., R.N. Kathy Stephens, R.N., MSN Barney S. Graham, M.D. Elham Bayat Mokhtari, Ph.D. Prakriti Mudvari, Ph.D. Eli Boritz, M.D., Ph.D. Adrian Creanga, Ph.D. Amarendra Pegu, Ph.D. Alexandrine Derrien-Colemy, Ph.D. Amy R. Henry, M.S. Matthew Gagne, Ph.D. Daniel C. Douek, M.D., Ph.D. Malaya K. Sahoo, Ph.D. Mamdouh Sibai, B.S. Daniel Solis, B.S. Richard J. Webby, Ph.D. Trushar Jeevan, B.S, M.PH. Thomas P. Fabrizio, Ph.D.

## Certification

I certify that the information provided in this disclosure is complete and accurate.

**Disclosure Purpose:** 21-07799

**Summary of Interests**

I do not have any interests to disclose at this time.

**Additional Questions:**

- 1. **Are there other relationships or activities that readers could perceive to have influenced, or that give the appearance of potentially influencing, what you wrote in the submitted work?**  
No.
- 2. **What is the manuscript title?**  
Infection and Vaccine-Induced Neutralizing Antibody Responses to the SARS-CoV-2 B.1.617 Variants
- 3. **Are you the corresponding author?**  
No.

**Certification**

I certify that the information provided in this disclosure is complete and accurate.

**Disclosure Purpose:** 21-07799

## Summary of Interests

I do not have any interests to disclose at this time.

## Additional Questions:

- Are there other relationships or activities that readers could perceive to have influenced, or that give the appearance of potentially influencing, what you wrote in the submitted work?**  
No.
- What is the manuscript title?**  
Infection and Vaccine-Induced Neutralizing Antibody Responses to the SARS-CoV-2 B.1.617 Variants
- Are you the corresponding author?**  
No.

## Certification

I certify that the information provided in this disclosure is complete and accurate.
